# Supplementary material
Source: PubMed Central journal article supplement (PMC3732781)
Supplement: NIHMS337427-supplement-1.pdf [file NIHMS337427-supplement-1.pdf]

## SUPPLEMENTAL ONLINE INFORMATION

### **X-chromosome hyperactivation in mammals via nonlinear relationships between chromatin states and transcription**

Eda Yildirim<sup>1,2,3¶</sup>, Ruslan I. Sadreyev<sup>1,2,3¶</sup>, Stefan F. Pinter<sup>1,2,3</sup> and Jeannie T. Lee<sup>\*1,2,3</sup>

<sup>1</sup>Howard Hughes Medical Institute

<sup>2</sup>Department of Molecular Biology, Massachusetts General Hospital

<sup>3</sup>Department of Genetics, Harvard Medical School

Boston, MA USA

¶ Authors contributed equally to this work.

\* Corresponding author: [lee@molbio.mgh.harvard.edu](mailto:lee@molbio.mgh.harvard.edu)

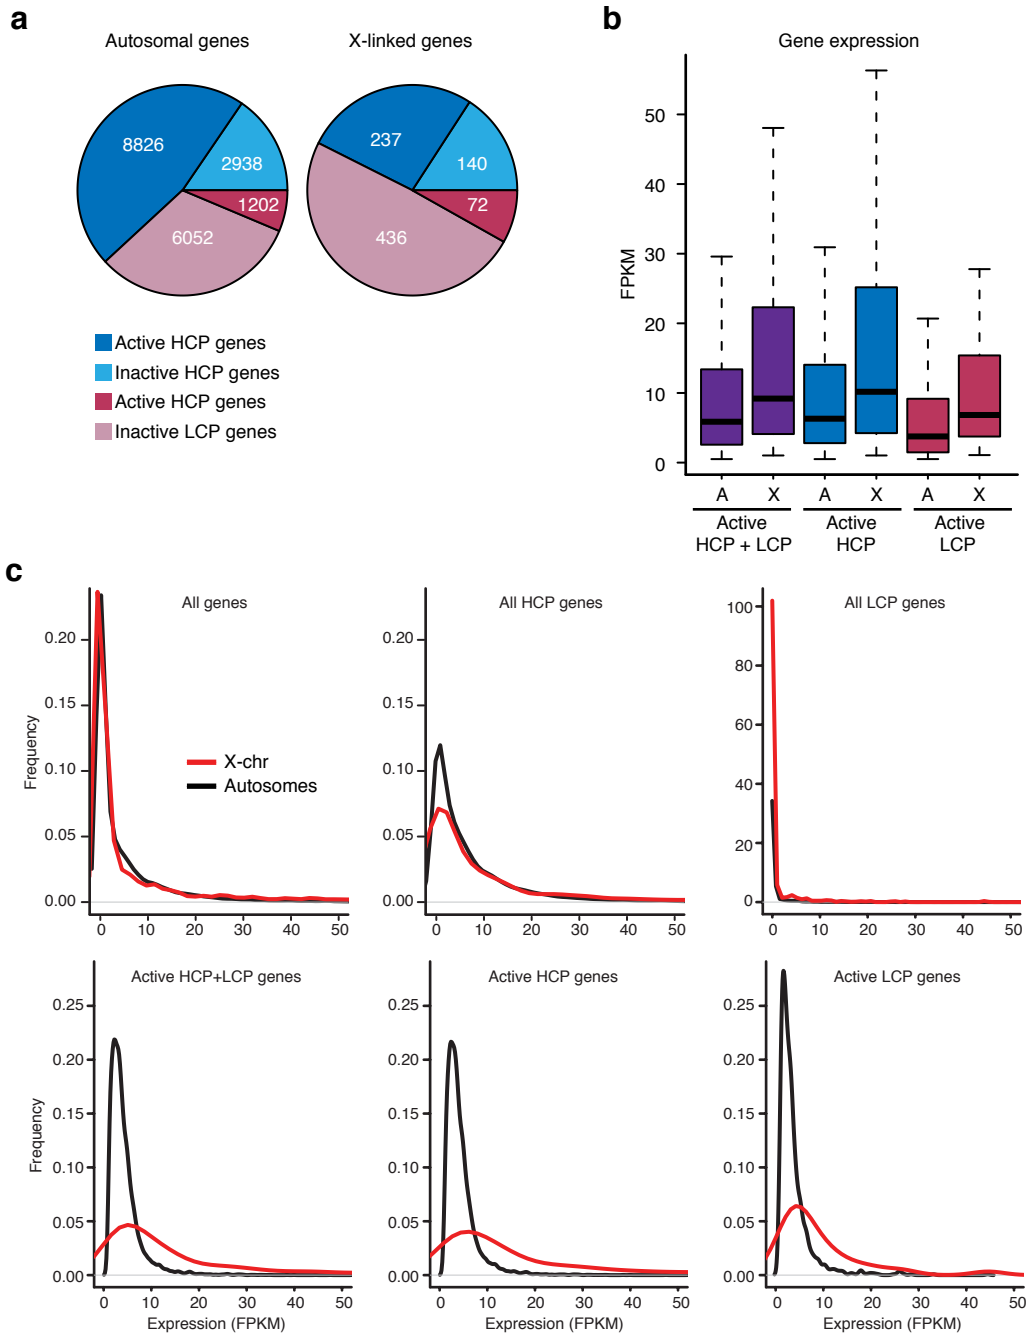

Supplementary Fig. 1-  
Yildirim et al.

**Supplementary Figure 1: Dosage compensation in actively expressed X-linked genes is masked by unusual gene composition on X chromosome.**

(a) Composition of autosomal and X-linked promoters with respect to CpG content and transcriptional activity. X chromosome has a much higher fraction of low-CpG promoters (LCP), which are more likely to be silent than autosomal counterparts. This difference, together with a higher fraction of silent high-CpG promoters (HCP), contributes to abnormally high number of silent X-linked genes.

(b) Actively expressed X-linked genes show X hypertranscription. Boxplots of FPKM values, with medians and lower/upper quartiles, are shown for active (HCP+LCP, HCP, and LCP) genes on X chromosome (X) and autosomes (A).

(c) X hypertranscription is apparent on the actively transcribed X-linked genes. Distributions of gene expression for all, HCP and LCP genes irrespective of expression status (top row), and for active (HCP+LCP, HCP, LCP) (bottom row) genes are shown. Black line, autosomal genes; red line, X-linked genes.

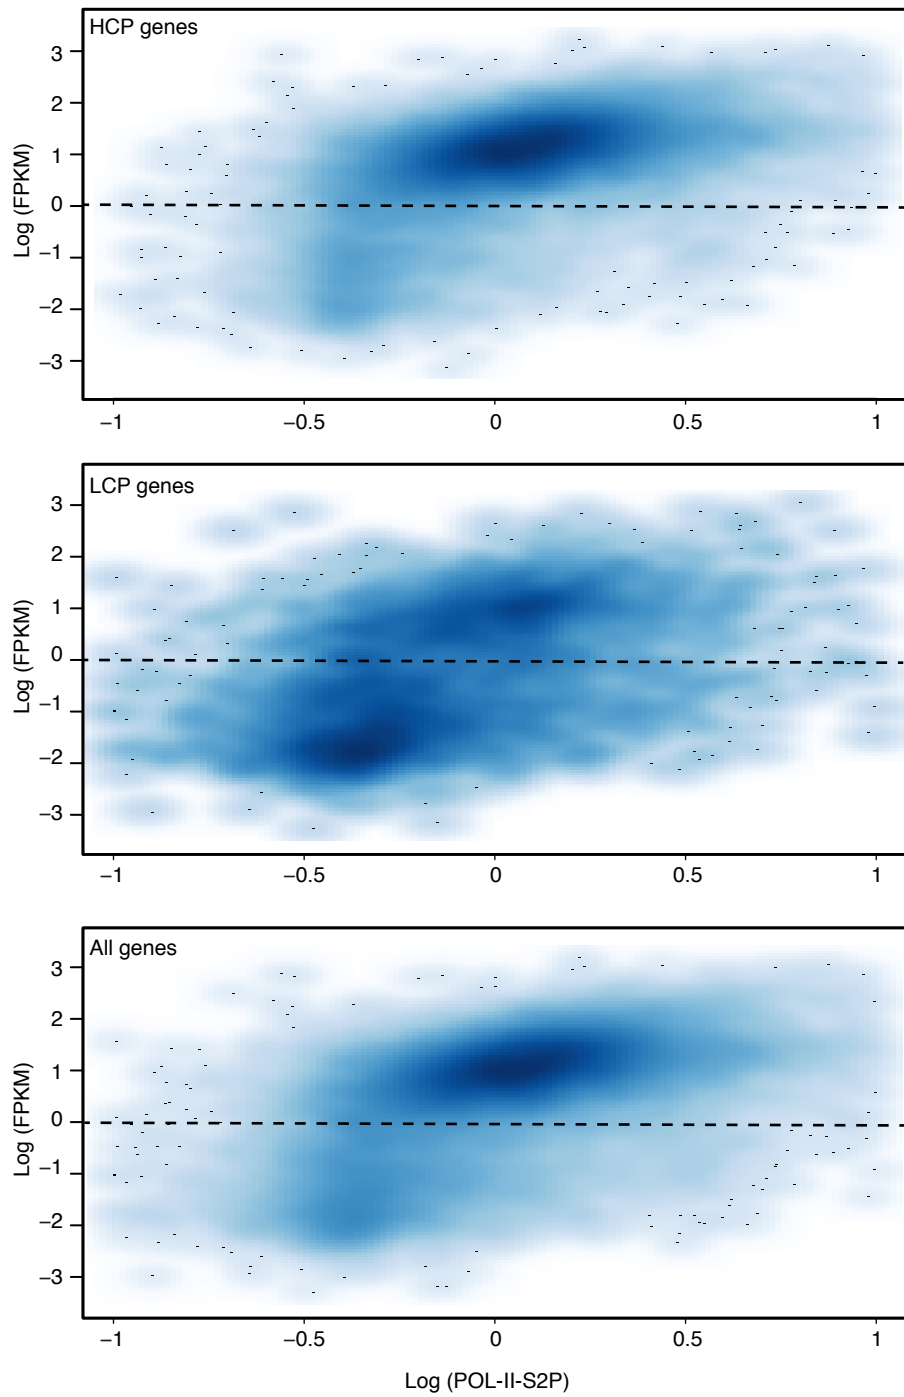

Supplementary Fig. 2-  
Yildirim et al.



**Supplementary Figure 2: Two distinct regimes of relationship between POL-II-S2P density on gene body and gene expression.**

Scatterplots of gene body POL-II-S2P density vs expression (FPKM) for all, HCP and LCP genes. Shades of blue indicate point densities. These plots, especially the plot with HCP genes, suggest two distinct regimes: No dependency at low POL-II-S2P and FPKM levels, presumably due to random low-range FPKM noise, and apparent linear relationship (in log-log scale) at higher levels, consistent with active transcription. Approximate FPKM boundary between the two regimes is shown as a horizontal line.

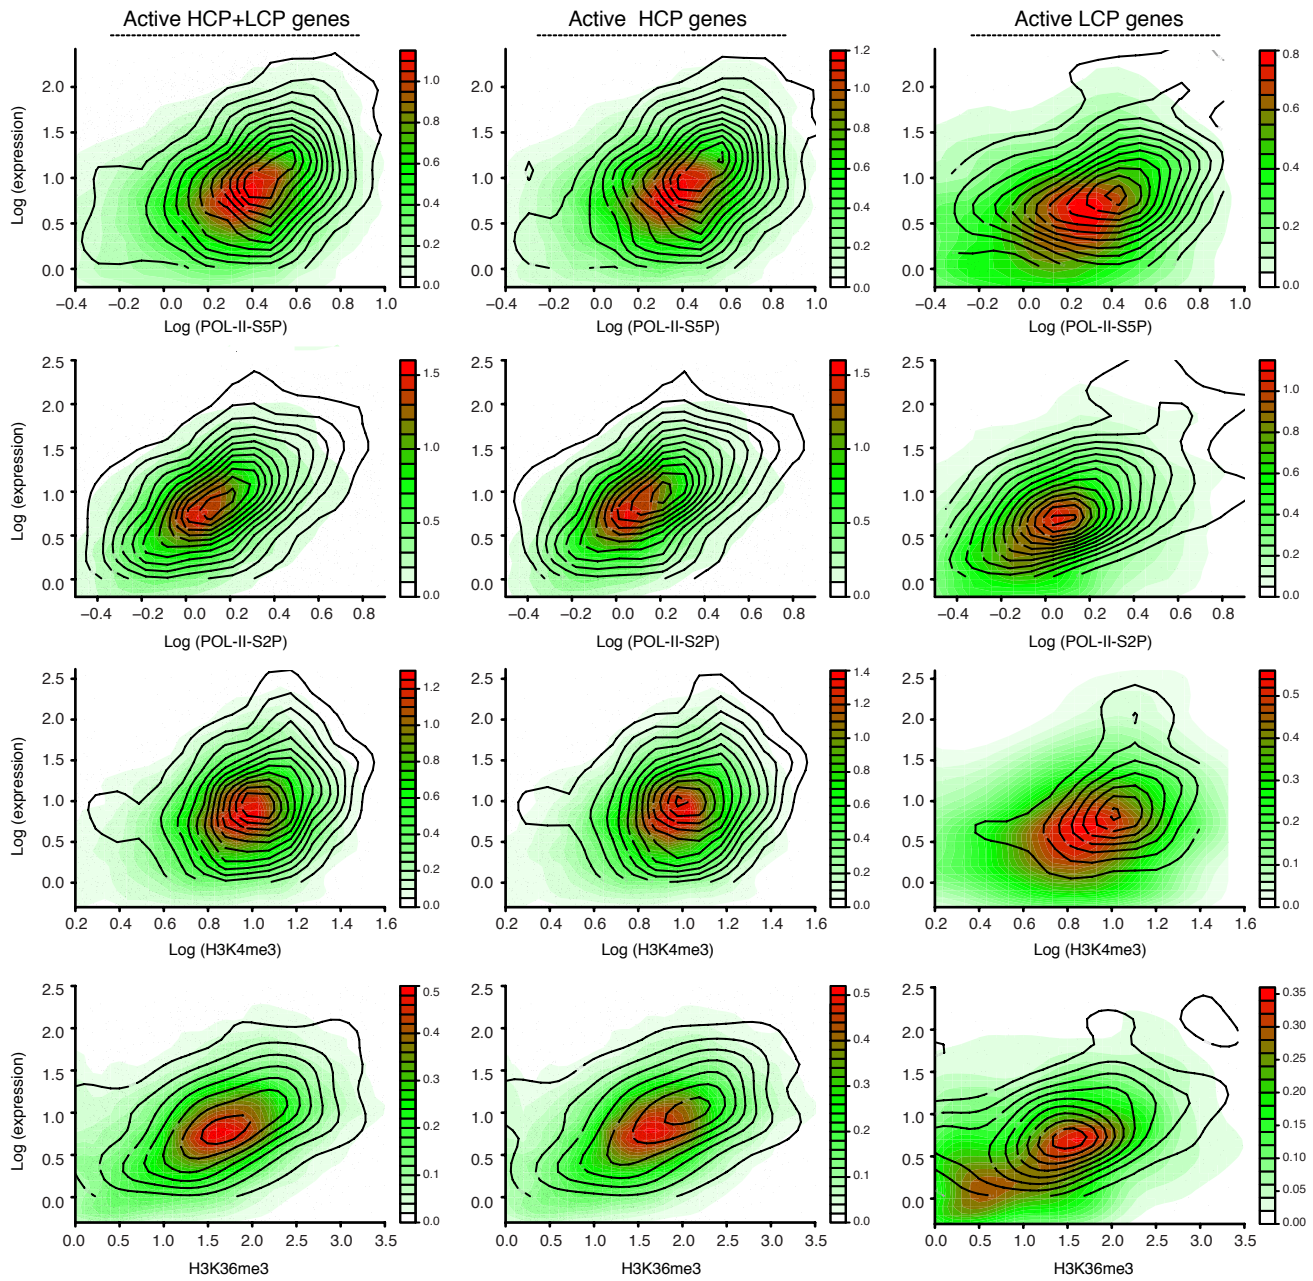

Supplementary Fig. 3-  
Yildirim et al.

**Supplementary Figure 3: Relationships between levels of gene expression, POL-II, H3K4me3 and H3K36me3 in active X-linked and autosomal genes.**

Scatterplots and point densities are shown for actively transcribed (HCP+LCP, HCP, and LCP) genes as indicated. Points and colored contour are shown for autosomal genes, black line contour represents X-linked *M. castaneus* alleles. POL-II at the TSS (first row), POL-II across the gene body (second row), H3K4me3 at the TSS (third row) and H3K36me3 across the gene body (fourth row) vs expression. All graphs are in log-log scale, except H3K36me3 vs expression plots which are in linear-log scale.

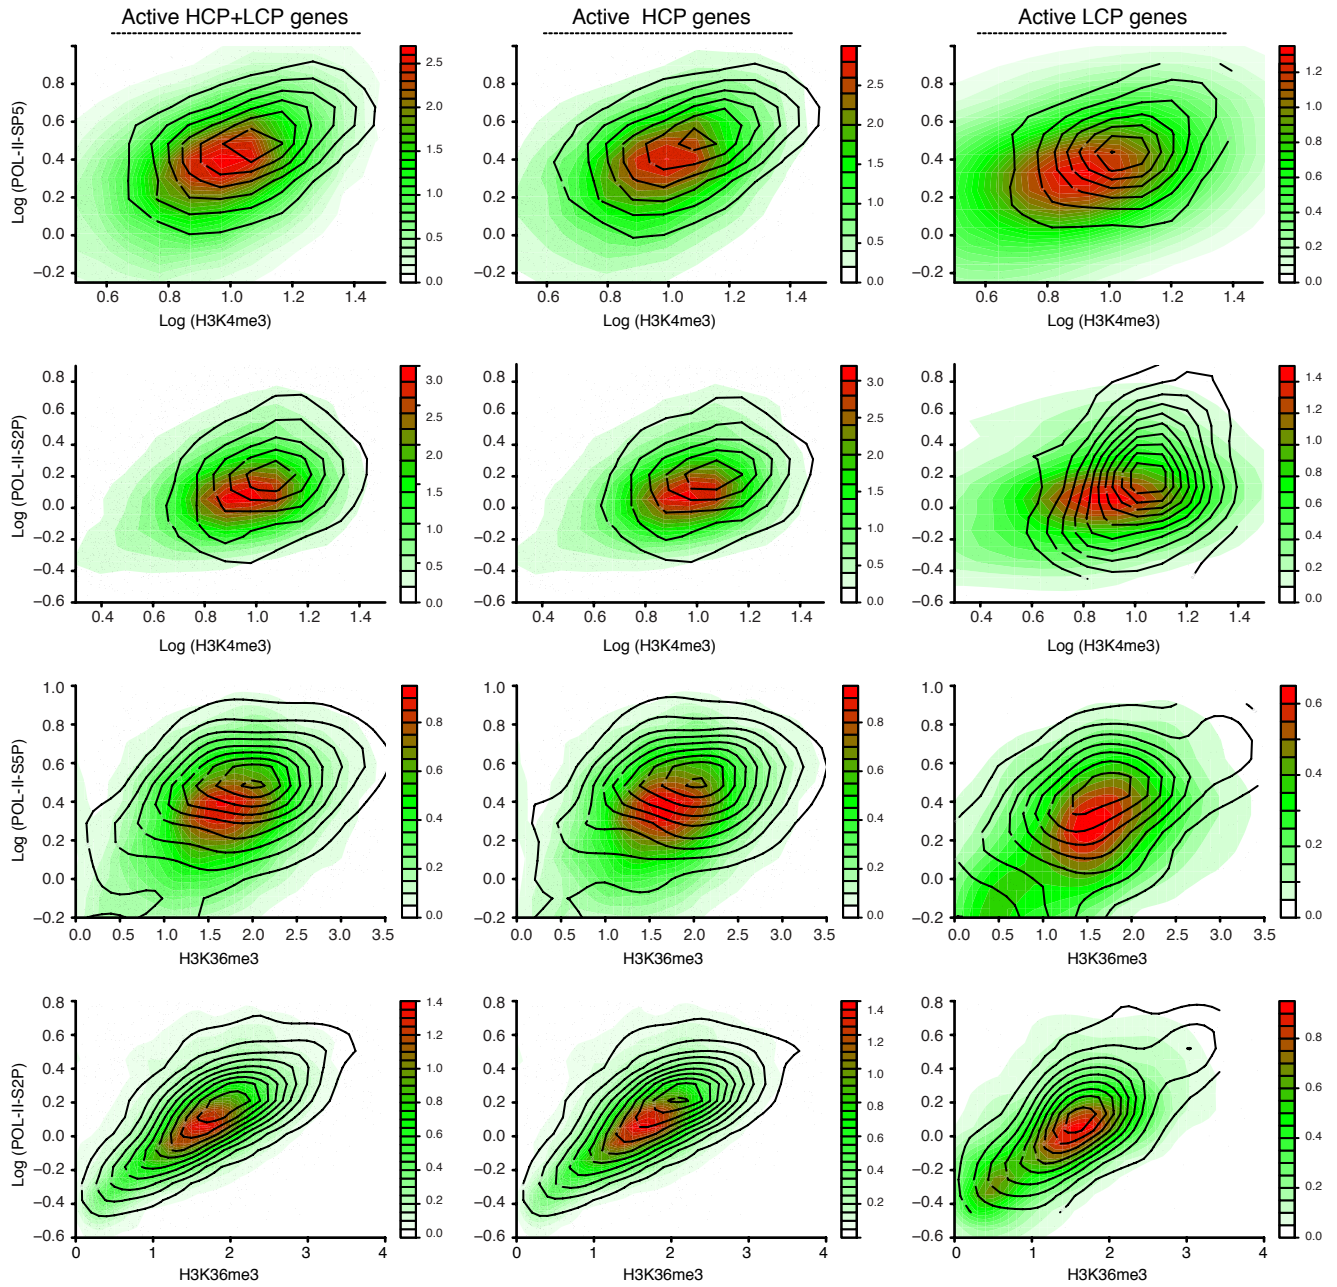

Supplementary Fig.4-  
Yildirim et al.

**Supplementary Figure 4: Relationships between H3K4me3 and H3K36me3 and POL-II at the TSS and gene body in active X-linked and autosomal genes.**

Scatterplots and point densities are shown for actively transcribed (HCP+LCP, HCP, and LCP) genes as indicated. Points and colored contour are shown for autosomal genes, black line contour represents X-linked *M. castaneus* alleles. H3K4me3 at the TSS vs POL-II at the TSS (first row), and POL-II across the gene body (second row) (log-log scale). H3K36me3 across the gene body vs POL-II at the TSS (third row), and POL-II across the gene body (fourth row) (linear-log scale).

**Supplementary Table I: Relative enrichment of POL-II and active chromatin marks on Xa versus autosome.**

| <b>ACTIVE HCP+LCP GENES</b>          |             | <b>Median</b>           |           |                                  | <b>Mean</b>             |           |                                  | <b>P-value</b> |
|--------------------------------------|-------------|-------------------------|-----------|----------------------------------|-------------------------|-----------|----------------------------------|----------------|
| <b>Position</b>                      | <b>ChIP</b> | <b>Haploid autosome</b> | <b>Xa</b> | <b>Xa:Haploid autosome ratio</b> | <b>Haploid autosome</b> | <b>Xa</b> | <b>Xa:Haploid autosome ratio</b> |                |
| TSS (± 3kb)                          | H3K4me3     | 8.077                   | 10.05     | 1.244                            | 8.651                   | 10.347    | 1.196                            | 1.10E-06       |
|                                      | POL-II-S5P  | 2.015                   | 2.635     | 1.308                            | 2.394                   | 2.886     | 1.205                            | 2.35E-05       |
| Gene body                            | H3K36me3    | 1.575                   | 1.719     | 1.091                            | 1.557                   | 1.699     | 1.091                            | 3.08E-03       |
|                                      | POL-II-S2P  | 1.174                   | 1.407     | 1.198                            | 1.676                   | 1.887     | 1.126                            | 1.38E-03       |
| <b>Gene expression (FPKM)</b>        |             | 5.87                    | 9.194     | 1.566                            | 15.668                  | 28.965    | 1.849                            | 2.27E-10       |
| <b>ACTIVE HCP GENES</b>              |             |                         |           |                                  |                         |           |                                  |                |
| <b>Position</b>                      | <b>ChIP</b> | <b>Haploid autosome</b> | <b>Xa</b> | <b>Xa:Haploid autosome ratio</b> | <b>Haploid autosome</b> | <b>Xa</b> | <b>Xa:Haploid autosome ratio</b> | <b>P-value</b> |
| TSS (± 3kb)                          | H3K4me3     | 8.403                   | 10.11     | 1.203                            | 9.063                   | 10.86     | 1.198                            | 6.24E-06       |
|                                      | POL-II-S5P  | 2.101                   | 2.731     | 1.3                              | 2.472                   | 3.062     | 1.238                            | 1.76E-05       |
| Gene body                            | H3K36me3    | 1.601                   | 1.786     | 1.115                            | 1.59                    | 1.77      | 1.113                            | 7.82E-04       |
|                                      | POL-II-S2P  | 1.204                   | 1.535     | 1.275                            | 1.714                   | 1.981     | 1.155                            | 3.80E-04       |
| <b>Gene expression (FPKM)</b>        |             | 6.269                   | 10.173    | 1.623                            | 15.914                  | 28.877    | 1.815                            | 9.85E-09       |
| <b>ACTIVE LCP GENES</b>              |             |                         |           |                                  |                         |           |                                  |                |
| <b>Position</b>                      | <b>ChIP</b> | <b>Haploid autosome</b> | <b>Xa</b> | <b>Xa:Haploid autosome ratio</b> | <b>Haploid autosome</b> | <b>Xa</b> | <b>Xa:Haploid autosome ratio</b> | <b>P-value</b> |
| TSS (± 3kb)                          | H3K4me3     | 4.518                   | 9.029     | 1.998                            | 5.622                   | 8.657     | 1.54                             | 2.86E-04       |
|                                      | POL-II-S5P  | 1.397                   | 2.233     | 1.598                            | 1.822                   | 2.309     | 1.267                            | 1.19E-02       |
| Gene body                            | H3K36me3    | 1.288                   | 1.443     | 1.12                             | 1.315                   | 1.465     | 1.114                            | 1.20E-01       |
|                                      | POL-II-S2P  | 0.943                   | 1.183     | 1.255                            | 1.398                   | 1.579     | 1.13                             | 1.43E-01       |
| <b>Gene expression (FPKM)</b>        |             | 3.759                   | 6.83      | 1.817                            | 13.857                  | 29.255    | 2.111                            | 8.05E-06       |
| <b>ALL GENES (active + inactive)</b> |             |                         |           |                                  |                         |           |                                  |                |
| <b>Position</b>                      | <b>ChIP</b> | <b>Haploid autosome</b> | <b>Xa</b> | <b>Xa:Haploid autosome ratio</b> | <b>Haploid autosome</b> | <b>Xa</b> | <b>Xa:Haploid autosome ratio</b> | <b>P-value</b> |
| TSS (± 3kb)                          | H3K4me3     | 2.772                   | 0.339     | 0.122                            | 5.069                   | 4.444     | 0.877                            | 6.52E-17       |
|                                      | POL-II-S5P  | 0.723                   | 0.463     | 0.640                            | 1.132                   | 1.021     | 0.902                            | 3.05E-14       |
| Gene body                            | H3K36me3    | 0.732                   | 0.333     | 0.455                            | 0.979                   | 0.800     | 0.817                            | 4.60E-19       |
|                                      | POL-II-S2P  | 0.965                   | 0.561     | 0.582                            | 1.548                   | 1.452     | 0.938                            | 5.22E-19       |
| <b>Gene expression (FPKM)</b>        |             | 0.861                   | 0.011     | 0.013                            | 8.282                   | 10.148    | 1.225                            | 5.38E-19       |

**Supplementary Table I: Relative enrichment of POL-II and active chromatin marks on Xa versus autosome.**

Statistics and fold difference between X chromosome and autosomes are shown for all (inactive and active genes regardless of CpG categorization), and all transcriptionally active (HCP+LCP, HCP, LCP) genes, along with the Mann-Whitney U test P-values for the comparison of X-linked and autosomal gene sets.

**Supplementary Table II: ChIP-seq statistics.**

| Antibodies | No. of clusters | No. of aligned reads |     | No. of unique reads |     | No. of allelic reads |     | No. of neutral reads |     |
|------------|-----------------|----------------------|-----|---------------------|-----|----------------------|-----|----------------------|-----|
| Input 1    | 19.5            | 18.6                 | 95% | 15.5                | 83% | 5.6                  | 36% | 9.9                  | 64% |
| Input 2    | 28.7            | 27.5                 | 96% | 23.1                | 84% | 8.5                  | 37% | 14.6                 | 63% |
| H3K4me3    | 20.4            | 19.4                 | 95% | 17.9                | 93% | 5.5                  | 31% | 12.5                 | 69% |
| H3K36me3   | 17.2            | 16.5                 | 96% | 14.4                | 87% | 5.1                  | 36% | 9.2                  | 64% |
| POL-II-S5P | 26.0            | 24.3                 | 93% | 21.6                | 89% | 7.6                  | 35% | 14.0                 | 65% |
| POL-II-S2P | 25.0            | 21.9                 | 88% | 19.4                | 89% | 6.9                  | 35% | 12.6                 | 65% |



**Supplementary Table II: ChIP-seq statistics.**

Basic descriptive statistics are shown for four experiments with antibodies for POL-II and active histone modifications (H3K4me3, H3K36me3), as well as two controls (input 1 and 2) used in coverage normalization.

**Supplementary Table III: Prediction accuracy for linear models of expression based on all possible combinations of predictors.**

| Combination of marks                   | ALL GENES       |                 |                 |                 | ALL HCP GENES   |                 |                 |                 | ALL LCP GENES   |                 |                 |                 |
|----------------------------------------|-----------------|-----------------|-----------------|-----------------|-----------------|-----------------|-----------------|-----------------|-----------------|-----------------|-----------------|-----------------|
|                                        | Non-zero        |                 | Pseudocount     |                 | Non-zero        |                 | Pseudocount     |                 | Non-zero        |                 | Pseudocount     |                 |
|                                        | Autosomes       | X chr           |
| POL-II-S2P+POL-II-S2P+H3K4me3+H3K36me3 | 0.694 ± 1.0e-01 | 0.713 ± 4.2e-04 | 0.748 ± 2.8e-02 | 0.744 ± 1.1e-04 | 0.648 ± 1.1e-01 | 0.657 ± 1.5e-03 | 0.678 ± 3.6e-02 | 0.679 ± 3.8e-04 | 0.654 ± 5.4e-02 | 0.756 ± 5.1e-04 | 0.635 ± 9.1e-02 | 0.656 ± 9.3e-04 |
| POL-II-S2P+H3K4me3+H3K36me3            | 0.694 ± 1.0e-01 | 0.714 ± 3.0e-04 | 0.748 ± 2.8e-02 | 0.744 ± 1.1e-04 | 0.649 ± 1.1e-01 | 0.659 ± 1.2e-03 | 0.678 ± 3.6e-02 | 0.678 ± 3.2e-04 | 0.655 ± 5.4e-02 | 0.756 ± 5.4e-04 | 0.636 ± 9.0e-02 | 0.657 ± 7.1e-04 |
| POL-II-S2P+H3K4me3+H3K36me3            | 0.687 ± 1.0e-01 | 0.699 ± 5.1e-04 | 0.742 ± 2.8e-02 | 0.744 ± 5.1e-05 | 0.637 ± 1.1e-01 | 0.636 ± 1.6e-03 | 0.667 ± 3.0e-02 | 0.668 ± 2.5e-04 | 0.653 ± 5.3e-02 | 0.752 ± 6.2e-04 | 0.634 ± 9.1e-02 | 0.660 ± 7.1e-04 |
| POL-II-S2P+POL-II-S2P+H3K36me3         | 0.633 ± 9.1e-02 | 0.646 ± 6.6e-04 | 0.717 ± 3.5e-02 | 0.716 ± 7.2e-05 | 0.602 ± 9.6e-02 | 0.593 ± 1.5e-03 | 0.660 ± 3.7e-02 | 0.663 ± 5.1e-04 | 0.595 ± 6.5e-02 | 0.717 ± 1.1e-04 | 0.570 ± 9.6e-02 | 0.595 ± 1.5e-03 |
| POL-II-S2P+POL-II-S2P+H3K4me3          | 0.654 ± 1.0e-01 | 0.687 ± 5.7e-04 | 0.713 ± 3.2e-02 | 0.717 ± 1.1e-04 | 0.596 ± 1.1e-01 | 0.655 ± 6.7e-04 | 0.617 ± 5.1e-02 | 0.654 ± 5.7e-04 | 0.607 ± 6.5e-02 | 0.692 ± 1.2e-03 | 0.605 ± 9.0e-02 | 0.620 ± 5.7e-04 |
| POL-II-S2P+POL-II-S2P                  | 0.544 ± 8.9e-02 | 0.637 ± 1.9e-04 | 0.632 ± 4.6e-02 | 0.660 ± 9.9e-05 | 0.504 ± 1.0e-01 | 0.609 ± 4.6e-04 | 0.554 ± 6.5e-02 | 0.645 ± 2.6e-04 | 0.502 ± 9.1e-02 | 0.645 ± 5.1e-04 | 0.485 ± 9.6e-02 | 0.497 ± 2.1e-05 |
| POL-II-S2P+H3K4me3                     | 0.629 ± 1.0e-01 | 0.637 ± 5.7e-04 | 0.694 ± 2.6e-02 | 0.707 ± 4.0e-05 | 0.559 ± 1.1e-01 | 0.601 ± 6.8e-04 | 0.580 ± 3.2e-02 | 0.622 ± 4.6e-04 | 0.590 ± 5.5e-02 | 0.643 ± 6.8e-04 | 0.597 ± 8.8e-02 | 0.621 ± 3.8e-04 |
| POL-II-S2P+H3K36me3                    | 0.625 ± 9.1e-02 | 0.628 ± 8.0e-04 | 0.708 ± 3.5e-02 | 0.714 ± 4.3e-05 | 0.590 ± 9.5e-02 | 0.569 ± 1.6e-03 | 0.648 ± 3.1e-02 | 0.650 ± 3.1e-04 | 0.593 ± 6.4e-02 | 0.714 ± 5.3e-05 | 0.567 ± 9.7e-02 | 0.601 ± 1.2e-03 |
| POL-II-S2P+H3K4me3                     | 0.654 ± 1.0e-01 | 0.686 ± 5.9e-04 | 0.712 ± 3.2e-02 | 0.715 ± 1.0e-04 | 0.596 ± 1.1e-01 | 0.655 ± 5.9e-04 | 0.616 ± 5.1e-02 | 0.648 ± 4.6e-04 | 0.604 ± 6.6e-02 | 0.691 ± 1.2e-03 | 0.604 ± 9.1e-02 | 0.623 ± 3.9e-04 |
| POL-II-S2P+H3K36me3                    | 0.619 ± 8.6e-02 | 0.627 ± 3.0e-04 | 0.708 ± 3.7e-02 | 0.705 ± 4.5e-05 | 0.594 ± 9.2e-02 | 0.574 ± 6.2e-04 | 0.655 ± 3.8e-02 | 0.647 ± 4.6e-04 | 0.583 ± 6.6e-02 | 0.709 ± 4.9e-05 | 0.559 ± 9.7e-02 | 0.596 ± 1.2e-03 |
| H3K4me3+H3K36me3                       | 0.686 ± 1.0e-01 | 0.695 ± 2.5e-04 | 0.740 ± 2.9e-02 | 0.743 ± 4.7e-05 | 0.634 ± 1.0e-01 | 0.629 ± 1.2e-03 | 0.664 ± 3.2e-02 | 0.659 ± 1.7e-04 | 0.653 ± 5.3e-02 | 0.752 ± 6.2e-04 | 0.635 ± 9.1e-02 | 0.663 ± 3.3e-04 |
| POL-II-S2P                             | 0.496 ± 8.8e-02 | 0.564 ± 3.4e-16 | 0.588 ± 3.4e-02 | 0.632 ± 5.1e-16 | 0.439 ± 9.1e-02 | 0.545 ± 1.1e-16 | 0.494 ± 4.5e-02 | 0.597 ± 0.0e+00 | 0.468 ± 7.9e-02 | 0.576 ± 2.3e-16 | 0.455 ± 9.1e-02 | 0.479 ± 2.3e-16 |
| POL-II-S2P                             | 0.489 ± 7.7e-02 | 0.594 ± 1.1e-16 | 0.572 ± 5.4e-02 | 0.605 ± 1.1e-16 | 0.468 ± 9.3e-02 | 0.561 ± 1.1e-16 | 0.510 ± 7.2e-02 | 0.585 ± 1.1e-16 | 0.431 ± 1.1e-01 | 0.610 ± 3.4e-16 | 0.406 ± 9.9e-02 | 0.446 ± 1.1e-16 |
| H3K4me3                                | 0.614 ± 9.9e-02 | 0.599 ± 2.3e-16 | 0.684 ± 2.7e-02 | 0.696 ± 2.3e-16 | 0.540 ± 1.0e-01 | 0.552 ± 1.1e-16 | 0.561 ± 3.2e-02 | 0.580 ± 1.1e-16 | 0.572 ± 5.1e-02 | 0.614 ± 2.3e-16 | 0.589 ± 8.7e-02 | 0.626 ± 0.0e+00 |
| H3K36me3                               | 0.588 ± 8.5e-02 | 0.574 ± 2.3e-16 | 0.683 ± 4.3e-02 | 0.689 ± 5.1e-16 | 0.557 ± 8.8e-02 | 0.507 ± 0.0e+00 | 0.626 ± 3.6e-02 | 0.605 ± 1.1e-16 | 0.574 ± 6.6e-02 | 0.700 ± 1.1e-16 | 0.549 ± 1.0e-01 | 0.608 ± 1.1e-16 |

**Supplementary Table III: Prediction accuracy for linear models of expression based on all possible combinations of predictors.**

For each combination of predictors (indicated in the first column), average Pearson correlation coefficients between predicted and observed logarithms of expression are shown for individual autosomes ('Autosomes') and X chromosome ('X chr'). Linear models were trained on autosomal data with one autosome excluded; predictions were assessed for this autosome and X chromosome. Averages over 19 such experiments, with each individual autosome excluded, are indicated for models based on all, HCP and LCP genes. Logarithmic transformation was applied to all expression and predictor values, except for H3K36me3 density. Linear models were trained and tested on two types of log-transformed data. First, pseudocount of 1.0 was added to the value before taking its logarithm ('Pseudocount' columns). Second, only genes with non-zero values were used for logarithmic transformation and model training/testing ('Non-zero' columns).
